# Supplementary material for: A pH-Responsive DNA Tetrahedron/Methotrexate Drug Delivery System Used for Rheumatoid Arthritis Treatment
Source: MDPI journal article supplement (doi:10.3390/jfb14110541), 2023-11-03
Supplement: s1 [file s1]

# Electronic Supplementary Material

## A pH-responsive DNA tetrahedron/methotrexate drug delivery system used for rheumatoid arthritis treatment

Yi Jin<sup>1,2†</sup>, Xingyu Ge<sup>3†</sup>, Yinjin Xu<sup>1</sup>, Siyi Wang<sup>1</sup>, Qian Lu<sup>1</sup>, Aidong Deng<sup>4</sup>, Jingjing Li<sup>2,\*</sup>, Zhifeng Gu<sup>4,\*</sup>

<sup>1</sup>Department of Rheumatology, Affiliated Hospital of Nantong University, Medical School of Nantong University, Nantong, 226000, China; jin\_yibai@126.com (Y.J.); 13862959217@163.com (Y.X.); siyiwang5@163.com (S.W.); luqian960927@163.com (Q.L.)

<sup>2</sup>Research Center of Clinical Medicine, Affiliated Hospital of Nantong University, Nantong, 226000, China

<sup>3</sup>Department of Rheumatology, Yancheng Third People's Hospital, Yancheng, 224000, China; 15896260521@163.com

<sup>4</sup>Department of Hand Surgery, Affiliated Hospital of Nantong University, Nantong, 226000, China; aidong\_deng@163.com

\*Correspondence: 13861903880@163.com (J.L.); guzfn@ntu.edu.cn (Z.G.)

†These authors contributed equally to this work.

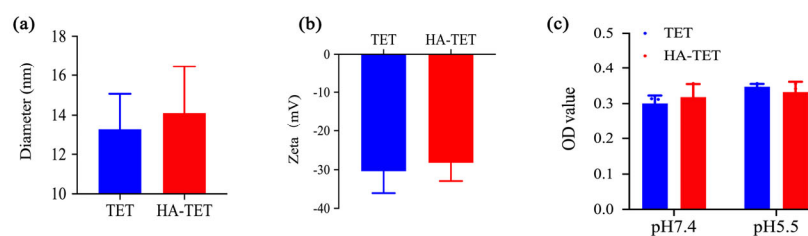

**Figure S1.** Characterization of HE-TET nanoparticles. (a) The particle size of TET and HA-TET. (b) The zeta potential of TET and HA-TET. (c) The OD value of TET and HA-TET in different pH.
